# Supplementary material for: Physicochemical Characteristics of Biochar from Waste Cricket Chitin (Acheta domesticus)
Source: MDPI journal article supplement (doi:10.3390/molecules27228071), 2022-11-21
Supplement: s1 [file s1]

# Physicochemical Characteristics of Biochar from Waste Cricket Chitin (*Acheta domesticus*)

Krzysztof Różyło <sup>1,\*</sup>, Katarzyna Jędruchniewicz <sup>2</sup>, Patrycja Krasucka <sup>2</sup>, Wojciech Biszczak <sup>1</sup> and Patryk Oleszczuk <sup>2</sup>

<sup>1</sup> Department of Herbology and Plant Cultivation Techniques, University of Life Sciences in Lublin, Lublin, Poland

<sup>2</sup> Department of Radiochemistry and Environmental Chemistry, Faculty of Chemistry, Maria Curie-Skłodowska University, Lublin, Poland

\* Correspondence: krzysztof.rozylo@up.lublin.pl; Tel./Fax: +48-81-445-66-69

Data from XRD analysis

Table S1. Crystalline phases (with ICDD codes) in BCCH500.

| Lp | Ref. Code   | Compound Name | Chemical Formula | SemiQuant [%] |
|----|-------------|---------------|------------------|---------------|
| 1  | 01-089-1961 | Silicon Oxide | SiO <sub>2</sub> |               |

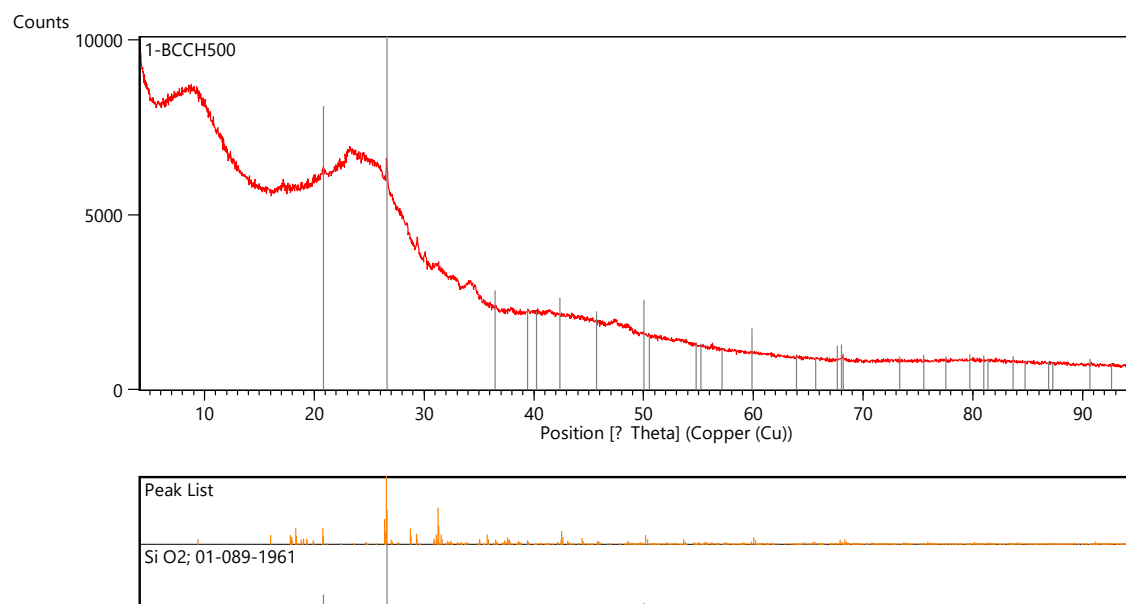

Figure S1. XRD patterns of BCCH500.

Table S2. Crystalline phases (with ICDD codes) in BCCH700.

| Lp | Ref. Code   | Compound Name    | Chemical Formula           | SemiQuant [%] |
|----|-------------|------------------|----------------------------|---------------|
| 1  | 04-009-8706 | Sodium Carbonate | $\text{Na}_2(\text{CO}_3)$ | 20(2)         |
| 2  | 04-008-9362 | Sodium Phosphate | $\text{Na}_3(\text{PO}_4)$ | 80(20)        |

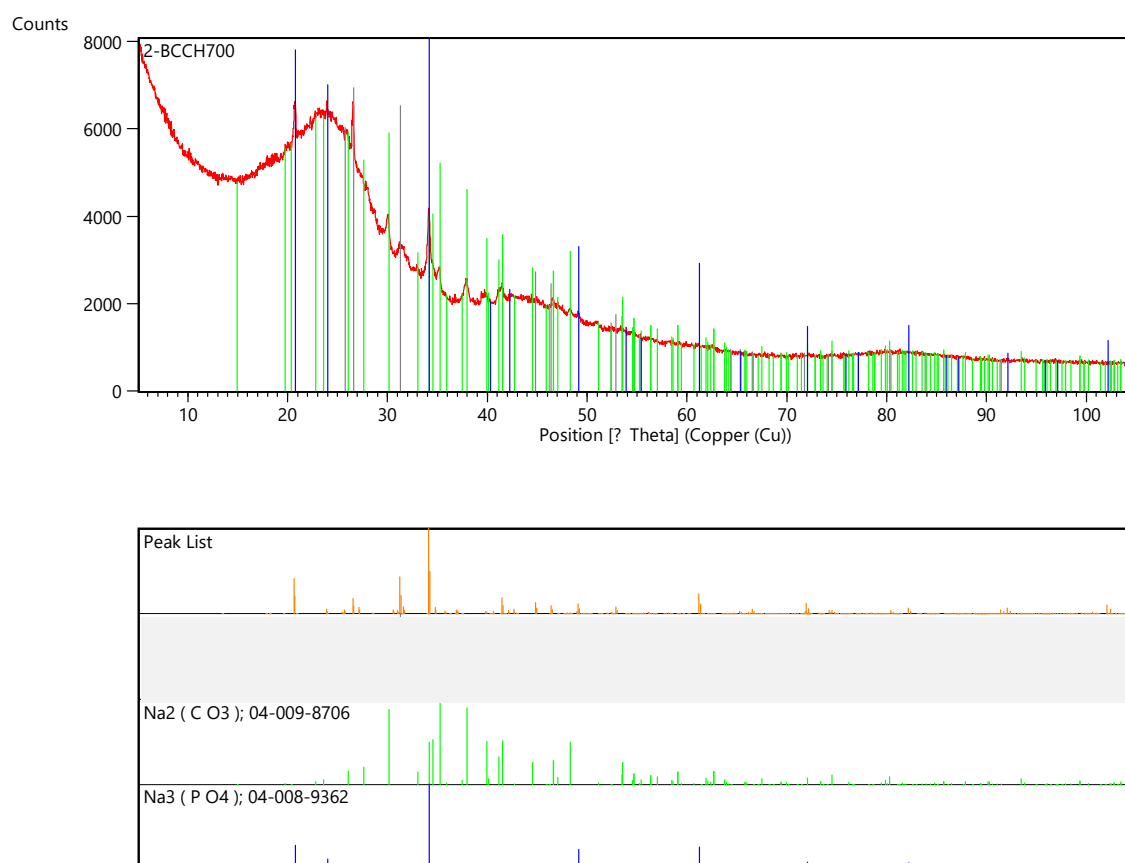

Figure S2. XRD patterns of BCCH700.

Table S3. Crystalline phases (with ICDD codes) in BCCR500.

| Lp | Ref. Code   | Compound Name               | Chemical Formula                               | SemiQuant [%] |
|----|-------------|-----------------------------|------------------------------------------------|---------------|
| 1  | 04-007-9713 | Potassium Chloride          | KCl                                            | 52.0(4)       |
| 2  | 00-035-0819 | Potassium Phosphate         | $\text{KPO}_3$                                 | 11(1)         |
| 3  | 00-022-0805 | Potassium Calcium Phosphate | $\text{K}_2\text{CaP}_2\text{O}_7$             | 22(1)         |
| 4  | 04-017-8676 | Potassium Sodium Phosphate  | $\text{K}_2\text{Na}_3\text{P}_3\text{O}_{10}$ | 16(1)         |

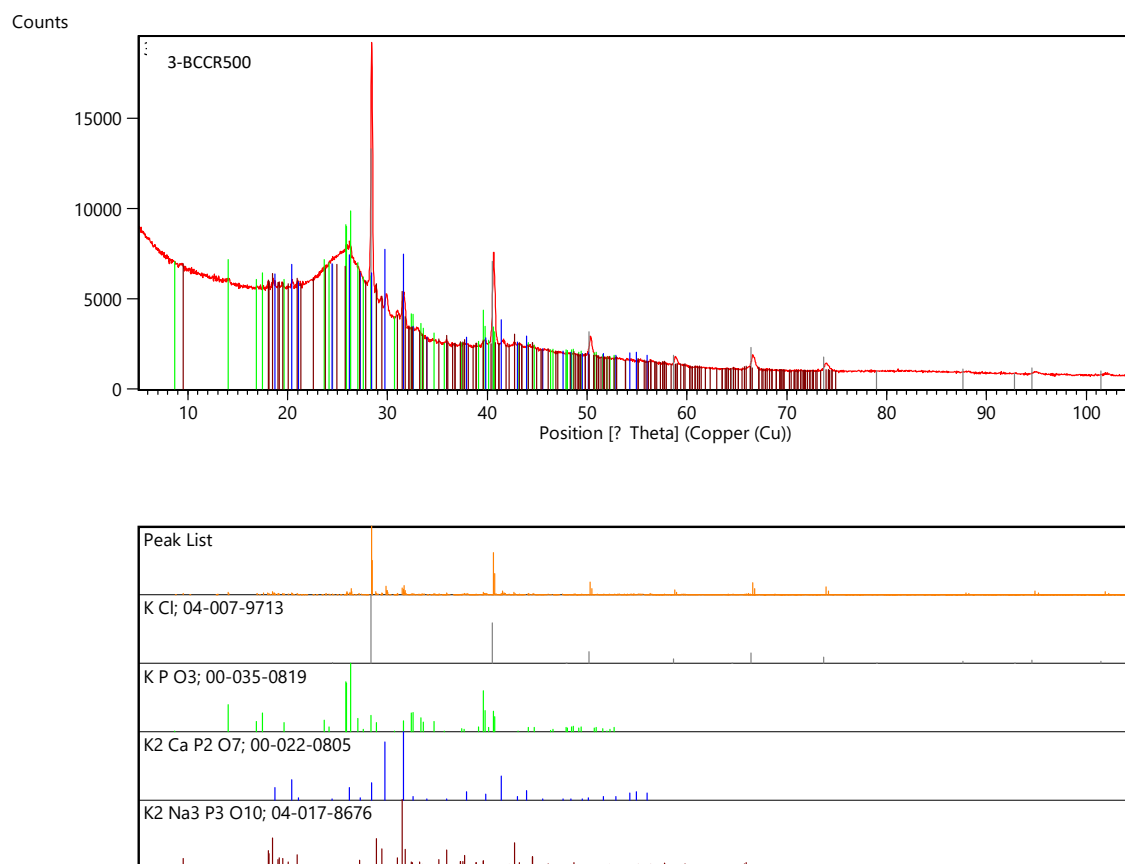

Figure S3. XRD patterns of BCCR500.

Table S4. Crystalline phases (with ICDD codes) in BCCR700.

| Lp | Ref. Code   | Compound Name               | Chemical Formula                               | SemiQuant [%] |
|----|-------------|-----------------------------|------------------------------------------------|---------------|
| 1  | 04-007-9713 | Potassium Chloride          | KCl                                            | 38(1)         |
| 2  | 00-035-0819 | Potassium Phosphate         | KPO <sub>3</sub>                               | 44(1)         |
| 3  | 00-022-0805 | Potassium Calcium Phosphate | K <sub>2</sub> CaP <sub>2</sub> O <sub>7</sub> | 18(1)         |

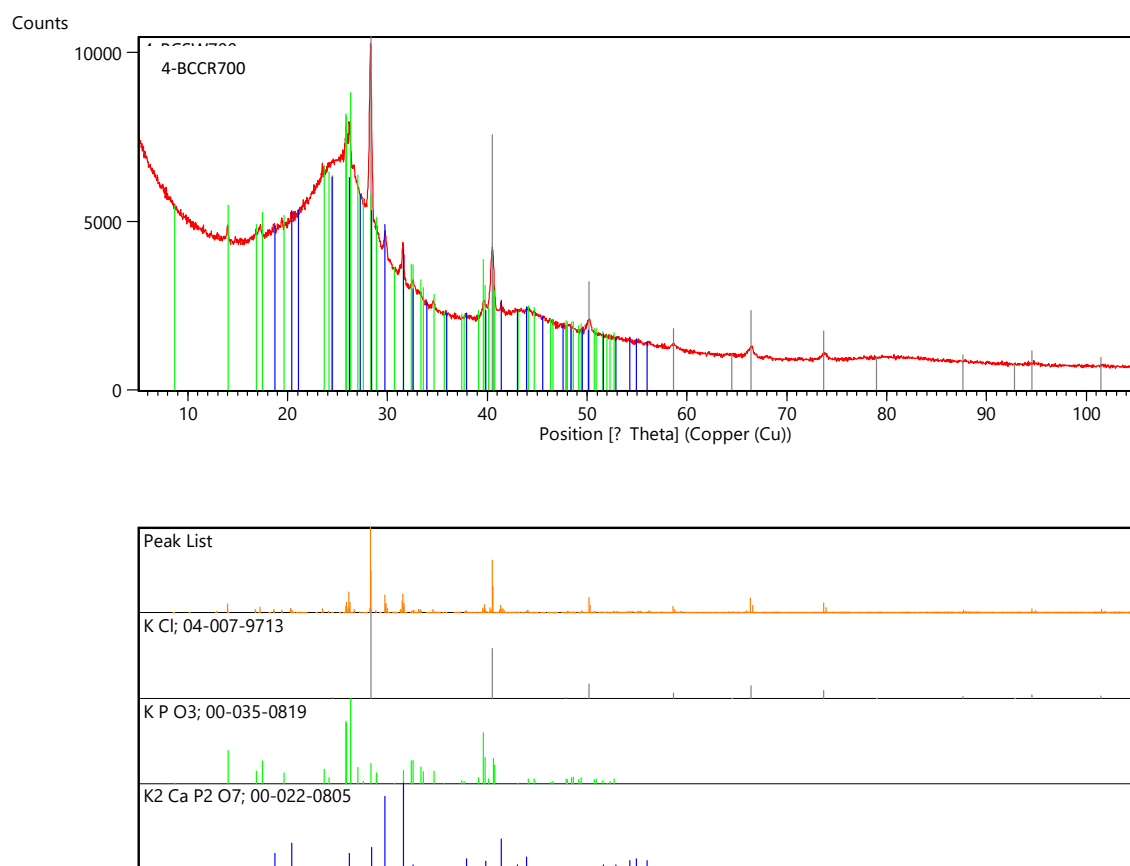

Figure S4. XRD patterns of BCCR700.
